# Supplementary material for: Performance assessment of variant calling pipelines using human whole exome sequencing and simulated data
Source: PubMed Central journal article supplement (PMC6580603; doi:10.1186/s12859-019-2928-9), 2019-06-17
Supplement: 12859_2019_2928_MOESM6_ESM.pdf [file 12859_2019_2928_MOESM6_ESM.pdf]

**Table S1.** Tools used in pipeline development.

| Tool                                  | Type           | Version | Algorithm                                                        | Features                                                                                                                         | Reference                                                                                                                                                                                             |
|---------------------------------------|----------------|---------|------------------------------------------------------------------|----------------------------------------------------------------------------------------------------------------------------------|-------------------------------------------------------------------------------------------------------------------------------------------------------------------------------------------------------|
| <b>Burrows-Wheeler Aligner (BWA)</b>  | Aligner        | 0.7.16  | BWA-backtrack, BWA-SW and BWA-MEM*<br><i>*Used in this study</i> | BWA-MEM and BWA-SW: long-read support and split alignment.<br>BWA-MEM: faster and more accurate, and is for high-quality queries | H. Li, R. Durbin, Fast and accurate short read alignment with Burrows-Wheeler Transform. <i>Bioinformatics</i> , 25 (2009) 1754-1760                                                                  |
| <b>Bowtie2</b>                        | Aligner        | 2.2.6   | Burrows-Wheeler transform, FM-index                              | Finds longer, gapped alignments                                                                                                  | B. Langmead, S.L. Salzberg, Fast gapped-read alignment with Bowtie 2, <i>Nat. Methods</i> . 9 (2012) 357-359.                                                                                         |
| <b>Novoalign</b>                      | Aligner        | 3.08.02 | Hash table indexing/Needleman-Wunsch algorithm                   | Slow, high memory usage, good for mapping with long gaps                                                                         | <a href="http://www.novocraft.com">http://www.novocraft.com</a>                                                                                                                                       |
| <b>SOAP</b>                           | Aligner        | 2.21    | Burrows-Wheeler transformation                                   | Speed and efficient memory usage                                                                                                 | R. Li, Y. Li, K. Kristiansen, J. Wang, SOAP: short oligonucleotide alignment program, <i>Bioinformatics</i> , 24 (2008) 713-714.                                                                      |
| <b>MOSAIK</b>                         | Aligner        | 2.2.3   | K-mer hash index/Smith-Waterman algorithm                        | Featured in a short-read, cross-species comparison, fast gaped alignment                                                         | W.P. Lee, M.P. Stromberg, A. Ward, C. Stewart, E.P. Garrison, G.T. Marth, MOSAIK: A Hash-Based Algorithm for Accurate Next-Generation Sequencing Short-Read Mapping. <i>PLOS ONE</i> 9 (2014) e90581. |
| <b>Genome Analysis Toolkit (GATK)</b> | Variant caller | 4       | Bayes' rule/ Smith-Waterman                                      | Only applied for small InDel                                                                                                     | <a href="https://software.broadinstitute.org/gatk/gatk4">https://software.broadinstitute.org/gatk/gatk4</a>                                                                                           |

|                         |                |       |                                                                                   |                                                                                                                                            |                                                                                                                                                                                                                                      |
|-------------------------|----------------|-------|-----------------------------------------------------------------------------------|--------------------------------------------------------------------------------------------------------------------------------------------|--------------------------------------------------------------------------------------------------------------------------------------------------------------------------------------------------------------------------------------|
| <b>FreeBayes</b>        | Variant caller | 1.1.0 | Bayes' rule                                                                       | Separate caller for SNPs, indels, and multi-nucleotide polymorphisms. Utilized by the 1000 Genomes Project                                 | E. Garrison, G. Marth, Haplotype-based variant detection from short-read sequencing, Cornell University Library, arXiv:1207.3907 [q-bio.GN], (2012).                                                                                 |
| <b>SAMtools mpileup</b> | Variant caller | 1.7   | MAQ model framework and general Bayesian framework                                | High positive prediction and simple use                                                                                                    | H. Li, B. Handsaker, A. Wysoker, T. Fennell, J. Ruan, N. Homer, G. Marth, G. Abecasis, R. Durbin, 1000 Genome Project Data Processing Subgroup. The sequence alignment/map format and SAMtools, Bioinformatics. 25 (2009) 2078-2079. |
| <b>DeepVariant</b>      | Variant caller | r0.4  | Trained Convolutional Neural Network (CNN); stochastic gradient descent algorithm | statistical modeling towards more automatic deep learning approaches for developing software to interpret biological instrumentation data. | bioRxiv preprint first posted online Dec. 14, 2016; doi: <a href="http://dx.doi.org/10.1101/092890">http://dx.doi.org/10.1101/092890</a>                                                                                             |
