# Supplementary material for: Performance assessment of variant calling pipelines using human whole exome sequencing and simulated data
Source: PubMed Central journal article supplement (PMC6580603; doi:10.1186/s12859-019-2928-9), 2019-06-17
Supplement: 12859_2019_2928_MOESM7_ESM.pdf [file 12859_2019_2928_MOESM7_ESM.pdf]

**Table S2.** Run time (in min) of 20 variant calling pipeline

| Pipeline               | Exome-1 | Exome-2 | Exome-3 | Exome-4 | Multithreading-aligner<br>(* available in commercial version) | Multithreading-Variant Caller |
|------------------------|---------|---------|---------|---------|---------------------------------------------------------------|-------------------------------|
| Bowtie_DeepVariant     | 2271    | 2314    | 2439    | 2436    | Y                                                             | Y                             |
| Bowtie_FreeBayes       | 2163    | 2094    | 2039    | 2169    | Y                                                             | N                             |
| Bowtie_GATK            | 2317    | 2489    | 2394    | 2393    | Y                                                             | Y                             |
| Bowtie_SAMtools        | 2394    | 2394    | 2483    | 2511    | Y                                                             | N                             |
| BWA_DeepVariant        | 2209    | 2397    | 2269    | 2393    | Y                                                             | Y                             |
| BWA_FreeBayes          | 2008    | 1954    | 2193    | 2218    | Y                                                             | N                             |
| BWA_GATK               | 2291    | 2089    | 2093    | 2189    | Y                                                             | Y                             |
| BWA_SAMtools           | 2394    | 2463    | 2286    | 2176    | Y                                                             | N                             |
| Mosaik_DeepVariant     | 2094    | 2375    | 2467    | 2199    | Y                                                             | Y                             |
| MOSAIK_FreeBayes       | 2174    | 2197    | 2394    | 2376    | Y                                                             | N                             |
| MOSAIK_GATK            | 2193    | 2294    | 2489    | 2547    | Y                                                             | Y                             |
| MOSAIK_SAMtools        | 2395    | 2456    | 2463    | 2531    | Y                                                             | N                             |
| Novoalign*_DeepVariant | 3294    | 3521    | 3675    | 3812    | Y*                                                            | Y                             |
| Novoalign*_FreeBayes   | 3217    | 3514    | 3591    | 3643    | Y*                                                            | N                             |
| Novoalign*_GATK        | 3391    | 3581    | 3721    | 3843    | Y*                                                            | Y                             |
| Novoalign*_SAMtools    | 3513    | 3617    | 3943    | 3899    | Y*                                                            | N                             |
| SOAP_DeepVariant       | 2231    | 2392    | 2281    | 2563    | Y                                                             | Y                             |
| SOAP_FreeBayes         | 2217    | 2346    | 2408    | 2317    | Y                                                             | N                             |
| SOAP_GATK              | 2364    | 2324    | 2194    | 2493    | Y                                                             | Y                             |
| SOAP_SAMtools          | 2509    | 2493    | 2376    | 2434    | Y                                                             | N                             |
