# Supplementary material for: Performance assessment of variant calling pipelines using human whole exome sequencing and simulated data
Source: PubMed Central journal article supplement (PMC6580603; doi:10.1186/s12859-019-2928-9), 2019-06-17
Supplement: 12859_2019_2928_MOESM9_ESM.pdf [file 12859_2019_2928_MOESM9_ESM.pdf]

**Table S4.** Performance (F-score) of pipelines with respect to genotype quality (GQ) for SNVs and InDels

| <b>Exome 1</b>        |             |           |           |           |           |            |               |           |           |           |           |            |
|-----------------------|-------------|-----------|-----------|-----------|-----------|------------|---------------|-----------|-----------|-----------|-----------|------------|
| <b>GQ</b>             | <b>0</b>    | <b>20</b> | <b>40</b> | <b>60</b> | <b>80</b> | <b>100</b> | <b>0</b>      | <b>20</b> | <b>40</b> | <b>60</b> | <b>80</b> | <b>100</b> |
| <b>Pipeline</b>       | <b>SNVs</b> |           |           |           |           |            | <b>InDels</b> |           |           |           |           |            |
| Bowtie DeepVariant    | 0           | 0.29      | 0.53      | 0.63      | 0.71      | 0.96       | 0             | 0.24      | 0.39      | 0.51      | 0.57      | 0.88       |
| Bowtie FreeBayes      | 0           | 0.13      | 0.31      | 0.41      | 0.57      | 0.93       | 0             | 0.19      | 0.33      | 0.42      | 0.53      | 0.85       |
| Bowtie GATK           | 0           | 0.22      | 0.44      | 0.54      | 0.63      | 0.95       | 0             | 0.28      | 0.44      | 0.56      | 0.62      | 0.00       |
| Bowtie SAMtools       | 0           | 0.28      | 0.53      | 0.63      | 0.75      | 0.96       | 0             | 0.11      | 0.23      | 0.31      | 0.39      | 0.76       |
| BWA DeepVariant       | 0           | 0.41      | 0.65      | 0.73      | 0.8       | 0.97       | 0             | 0.46      | 0.64      | 0.72      | 0.77      | 0.95       |
| BWA FreeBayes         | 0           | 0.23      | 0.41      | 0.52      | 0.61      | 0.94       | 0             | 0.18      | 0.39      | 0.48      | 0.55      | 0.87       |
| BWA GATK              | 0           | 0.24      | 0.45      | 0.56      | 0.65      | 0.96       | 0             | 0.37      | 0.56      | 0.65      | 0.71      | 0.00       |
| BWA SAMtools          | 0           | 0.35      | 0.58      | 0.68      | 0.75      | 0.97       | 0             | 0.12      | 0.27      | 0.34      | 0.41      | 0.77       |
| Mosaik DeepVariant    | 0           | 0.29      | 0.53      | 0.64      | 0.71      | 0.96       | 0             | 0.25      | 0.45      | 0.54      | 0.63      | 0.90       |
| MOSAIK FreeBayes      | 0           | 0.15      | 0.32      | 0.42      | 0.51      | 0.91       | 0             | 0.11      | 0.23      | 0.32      | 0.38      | 0.78       |
| MOSAIK GATK           | 0           | 0.01      | 0.05      | 0.06      | 0.07      | 0.23       | 0             | 0.03      | 0.04      | 0.08      | 0.12      | 0.00       |
| MOSAIK SAMtools       | -           | -         | -         | -         | -         | -          | -             | -         | -         | -         | -         | -          |
| Novoalign DeepVariant | 0           | 0.4       | 0.64      | 0.73      | 0.79      | 0.97       | 0             | 0.47      | 0.66      | 0.73      | 0.78      | 0.95       |
| Novoalign FreeBayes   | 0           | 0.14      | 0.32      | 0.42      | 0.52      | 0.91       | 0             | 0.21      | 0.38      | 0.48      | 0.55      | 0.87       |
| Novoalign GATK        | 0           | 0.23      | 0.44      | 0.55      | 0.63      | 0.96       | 0             | 0.37      | 0.57      | 0.66      | 0.71      | 0.00       |
| Novoalign SAMtools    | 0           | 0.35      | 0.59      | 0.69      | 0.76      | 0.97       | 0             | 0.14      | 0.29      | 0.37      | 0.44      | 0.80       |
| SOAP DeepVariant      | -           | -         | -         | -         | -         | -          | -             | -         | -         | -         | -         | -          |
| SOAP FreeBayes        | 0           | 0.07      | 0.18      | 0.26      | 0.33      | 0.83       | 0             | 0.04      | 0.05      | 0.09      | 0.15      | 0.33       |
| SOAP GATK             | 0           | 0.17      | 0.37      | 0.47      | 0.55      | 0.95       | 0             | 0.01      | 0.03      | 0.06      | 0.09      | 0.00       |
| SOAP SAMtools         | -           | -         | -         | -         | -         | -          | -             | -         | -         | -         | -         | -          |
| <b>Exome 2</b>        | <b>SNVs</b> |           |           |           |           |            | <b>InDels</b> |           |           |           |           |            |
| Bowtie DeepVariant    | 0           | 0.43      | 0.67      | 0.75      | 0.81      | 0.98       | 0             | 0.44      | 0.62      | 0.72      | 0.77      | 0.94       |
| Bowtie FreeBayes      | 0           | 0.21      | 0.42      | 0.53      | 0.61      | 0.94       | 0             | 0.06      | 0.12      | 0.19      | 0.24      | 0.60       |
| Bowtie GATK           | 0           | 0.19      | 0.39      | 0.53      | 0.59      | 0.93       | 0             | 0.24      | 0.39      | 0.51      | 0.61      | 0.00       |
| Bowtie SAMtools       | 0           | 0.41      | 0.65      | 0.74      | 0.8       | 0.98       | 0             | 0.14      | 0.25      | 0.39      | 0.45      | 0.77       |
| BWA DeepVariant       | 0           | 0.66      | 0.83      | 0.88      | 0.91      | 0.99       | 0             | 0.89      | 0.95      | 0.96      | 0.97      | 0.99       |
| BWA FreeBayes         | 0           | 0.28      | 0.54      | 0.64      | 0.72      | 0.96       | 0             | 0.06      | 0.14      | 0.19      | 0.26      | 0.62       |
| BWA GATK              | 0           | 0.29      | 0.52      | 0.62      | 0.72      | 0.00       | 0             | 0.66      | 0.81      | 0.86      | 0.89      | 0.00       |
| BWA SAMtools          | 0           | 0.54      | 0.75      | 0.82      | 0.87      | 0.98       | 0             | 0.16      | 0.28      | 0.37      | 0.45      | 0.76       |
| Mosaik DeepVariant    | 0           | 0.37      | 0.62      | 0.71      | 0.78      | 0.97       | 0             | 0.31      | 0.52      | 0.62      | 0.65      | 0.91       |
| MOSAIK FreeBayes      | 0           | 0.14      | 0.31      | 0.41      | 0.49      | 0.90       | 0             | 0.05      | 0.11      | 0.17      | 0.19      | 0.57       |

|                       |   |             |      |      |      |      |   |      |               |      |      |      |  |
|-----------------------|---|-------------|------|------|------|------|---|------|---------------|------|------|------|--|
| MOSAIK GATK           | 0 | 0.15        | 0.33 | 0.43 | 0.52 | 0.00 | 0 | 0.19 | 0.36          | 0.47 | 0.51 | 0.00 |  |
| MOSAIK SAMtools       | - | -           | -    | -    | -    | -    | - | -    | -             | -    | -    | -    |  |
| Novoalign DeepVariant | 0 | 0.67        | 0.84 | 0.89 | 0.92 | 0.99 | 0 | 0.87 | 0.93          | 0.95 | 0.96 | 0.99 |  |
| Novoalign FreeBayes   | 0 | 0.17        | 0.37 | 0.47 | 0.56 | 0.92 | 0 | 0.05 | 0.13          | 0.19 | 0.24 | 0.62 |  |
| Novoalign GATK        | 0 | 0.29        | 0.53 | 0.63 | 0.71 | 0.00 | 0 | 0.65 | 0.81          | 0.85 | 0.89 | 0.00 |  |
| Novoalign SAMtools    | 0 | 0.54        | 0.75 | 0.82 | 0.87 | 0.99 | 0 | 0.16 | 0.29          | 0.37 | 0.45 | 0.75 |  |
| SOAP DeepVariant      | - | -           | -    | -    | -    | -    | - | -    | -             | -    | -    | -    |  |
| SOAP FreeBayes        | 0 | 0.17        | 0.37 | 0.47 | 0.56 | 0.92 | 0 | 0.06 | 0.12          | 0.19 | 0.23 | 0.59 |  |
| SOAP GATK             | 0 | 0.24        | 0.47 | 0.58 | 0.66 | 0.00 | 0 | 0.18 | 0.32          | 0.43 | 0.48 | 0.00 |  |
| SOAP SAMtools         | - | -           | -    | -    | -    | -    | - | -    | -             | -    | -    | -    |  |
| <b>Exome 3</b>        |   | <b>SNVs</b> |      |      |      |      |   |      | <b>InDels</b> |      |      |      |  |
| Bowtie DeepVariant    | 0 | 0.37        | 0.61 | 0.71 | 0.77 | 0.97 | 0 | 0.22 | 0.38          | 0.49 | 0.55 | 0.91 |  |
| Bowtie FreeBayes      | 0 | 0.16        | 0.37 | 0.47 | 0.57 | 0.93 | 0 | 0.14 | 0.31          | 0.42 | 0.51 | 0.85 |  |
| Bowtie GATK           | 0 | 0.22        | 0.44 | 0.55 | 0.63 | 0.00 | 0 | 0.24 | 0.36          | 0.54 | 0.62 | 0.00 |  |
| Bowtie SAMtools       | 0 | 0.29        | 0.54 | 0.64 | 0.71 | 0.96 | 0 | 0.09 | 0.22          | 0.31 | 0.36 | 0.75 |  |
| BWA DeepVariant       | 0 | 0.51        | 0.73 | 0.79 | 0.85 | 0.98 | 0 | 0.41 | 0.64          | 0.71 | 0.76 | 0.95 |  |
| BWA FreeBayes         | 0 | 0.25        | 0.48 | 0.58 | 0.66 | 0.95 | 0 | 0.16 | 0.36          | 0.47 | 0.53 | 0.86 |  |
| BWA GATK              | 0 | 0.24        | 0.46 | 0.57 | 0.65 | 0.96 | 0 | 0.32 | 0.55          | 0.64 | 0.69 | 0.00 |  |
| BWA SAMtools          | 0 | 0.38        | 0.62 | 0.71 | 0.78 | 0.97 | 0 | 0.13 | 0.23          | 0.37 | 0.43 | 0.79 |  |
| Mosaik DeepVariant    | 0 | 0.32        | 0.58 | 0.67 | 0.74 | 0.97 | 0 | 0.11 | 0.28          | 0.47 | 0.63 | 0.83 |  |
| MOSAIK FreeBayes      | 0 | 0.15        | 0.33 | 0.43 | 0.52 | 0.91 | 0 | 0.09 | 0.22          | 0.31 | 0.36 | 0.78 |  |
| MOSAIK GATK           | 0 | 0.01        | 0.05 | 0.06 | 0.07 | 0.00 | 0 | 0.02 | 0.04          | 0.06 | 0.08 | 0.00 |  |
| MOSAIK SAMtools       | - | -           | -    | -    | -    | -    | - | -    | -             | -    | -    | -    |  |
| Novoalign DeepVariant | 0 | 0.48        | 0.71 | 0.79 | 0.84 | 0.98 | 0 | 0.16 | 0.32          | 0.39 | 0.45 | 0.95 |  |
| Novoalign FreeBayes   | 0 | 0.15        | 0.33 | 0.43 | 0.52 | 0.91 | 0 | 0.17 | 0.38          | 0.48 | 0.55 | 0.87 |  |
| Novoalign GATK        | 0 | 0.22        | 0.44 | 0.55 | 0.63 | 0.96 | 0 | 0.34 | 0.55          | 0.65 | 0.78 | 0.00 |  |
| Novoalign SAMtools    | 0 | 0.37        | 0.61 | 0.71 | 0.77 | 0.98 | 0 | 0.41 | 0.62          | 0.72 | 0.75 | 0.81 |  |
| SOAP DeepVariant      | - | -           | -    | -    | -    | -    | - | -    | -             | -    | -    | -    |  |
| SOAP FreeBayes        | 0 | 0.07        | 0.18 | 0.26 | 0.33 | 0.83 | 0 | 0.03 | 0.04          | 0.09 | 0.12 | 0.21 |  |
| SOAP GATK             | 0 | 0.19        | 0.44 | 0.51 | 0.59 | 0.00 | 0 | 0.01 | 0.02          | 0.03 | 0.04 | 0.00 |  |
| SOAP SAMtools         | - | -           | -    | -    | -    | -    | - | -    | -             | -    | -    | -    |  |
| <b>Exome 4</b>        |   | <b>SNVs</b> |      |      |      |      |   |      | <b>InDels</b> |      |      |      |  |
| Bowtie DeepVariant    | 0 | 0.39        | 0.64 | 0.73 | 0.79 | 0.97 | 0 | 0.32 | 0.54          | 0.63 | 0.7  | 0.92 |  |
| Bowtie FreeBayes      | 0 | 0.15        | 0.35 | 0.45 | 0.54 | 0.91 | 0 | 0.05 | 0.13          | 0.19 | 0.24 | 0.63 |  |
| Bowtie GATK           | 0 | 0.19        | 0.38 | 0.49 | 0.58 | 0.00 | 0 | 0.21 | 0.39          | 0.5  | 0.58 | 0.00 |  |
| Bowtie SAMtools       | 0 | 0.36        | 0.61 | 0.72 | 0.77 | 0.97 | 0 | 0.12 | 0.24          | 0.35 | 0.43 | 0.76 |  |
| BWA DeepVariant       | 0 | 0.48        | 0.71 | 0.79 | 0.84 | 0.98 | 0 | 0.82 | 0.91          | 0.94 | 0.95 | 0.99 |  |
| BWA FreeBayes         | 0 | 0.28        | 0.54 | 0.65 | 0.72 | 0.96 | 0 | 0.06 | 0.13          | 0.2  | 0.26 | 0.64 |  |
