# Supplementary material for: Performance assessment of variant calling pipelines using human whole exome sequencing and simulated data
Source: PubMed Central journal article supplement (PMC6580603; doi:10.1186/s12859-019-2928-9), 2019-06-17
Supplement: 12859_2019_2928_MOESM12_ESM.pdf [file 12859_2019_2928_MOESM12_ESM.pdf]

**Table S7.** Performance (F-score) pipelines in transition and transversion detection, and Ti/Tv ratio

| <b>Exome 1</b>        |                         |                           |                           |                             |                    |
|-----------------------|-------------------------|---------------------------|---------------------------|-----------------------------|--------------------|
| <b>Pipe line</b>      | <b>Transition count</b> | <b>Transition F-score</b> | <b>Transversion count</b> | <b>Transversion F-score</b> | <b>Ti/Tv ratio</b> |
| Bowtie_DeepVariant    | 18016                   | 0.96                      | 5302                      | 0.96                        | 3.40               |
| Bowtie_FreeBayes      | 17327                   | 0.93                      | 5099                      | 0.96                        | 3.40               |
| Bowtie_GATK           | 1792                    | 0.94                      | 5274                      | 0.95                        | 3.40               |
| Bowtie_SAMTools       | 18061                   | 0.96                      | 5315                      | 0.96                        | 3.40               |
| BWA_DeepVariant       | 18347                   | 0.97                      | 5399                      | 0.98                        | 3.40               |
| BWA_FreeBayes         | 17625                   | 0.94                      | 5187                      | 0.94                        | 3.40               |
| BWA_GATK              | 18292                   | 0.95                      | 5397                      | 0.96                        | 3.40               |
| BWA_SAMTools          | 18177                   | 0.97                      | 5350                      | 0.97                        | 3.40               |
| Mosaik_DeepVariant    | 18002                   | 0.96                      | 5298                      | 0.96                        | 3.40               |
| Mosaik_FreeBayes      | 17729                   | 0.91                      | 5217                      | 0.94                        | 3.40               |
| Mosaik_GATK           | 1724                    | 0.15                      | 1470                      | 0.08                        | 3.39               |
| Mosaik_SAMTools       | -                       | -                         | -                         | -                           | -                  |
| Novoalign_DeepVariant | 18338                   | 0.97                      | 5397                      | 0.98                        | 3.40               |
| Novoalign_FreeBayes   | 17891                   | 0.91                      | 5265                      | 0.95                        | 3.40               |
| Novoalign_GATK        | 18236                   | 0.94                      | 5401                      | 0.96                        | 3.40               |
| Novoalign_SAMTools    | 18210                   | 0.97                      | 5359                      | 0.97                        | 3.40               |
| SOAP_DeepVariant      | -                       | -                         | -                         | -                           | -                  |
| SOAP_FreeBayes        | 17688                   | 0.83                      | 5206                      | 0.94                        | 3.40               |
| SOAP_GATK             | 17170                   | 0.94                      | 5016                      | 0.91                        | 3.40               |
| SOAP_SAMTools         | -                       | -                         | -                         | -                           | -                  |
| <b>Exome 2</b>        |                         |                           |                           |                             |                    |
| <b>Pipe line</b>      | <b>Transition count</b> | <b>Transition F score</b> | <b>Transversion count</b> | <b>Transversion F score</b> | <b>Ti/Tv ratio</b> |
| Bowtie_DeepVariant    | 18400                   | 0.98                      | 5415                      | 0.98                        | 3.40               |
| Bowtie_FreeBayes      | 17667                   | 0.94                      | 5199                      | 0.94                        | 3.40               |

|                       |       |      |      |      |      |
|-----------------------|-------|------|------|------|------|
| Bowtie_GATK           | 16979 | 0.93 | 4997 | 0.96 | 3.40 |
| Bowtie_SAMTools       | 18446 | 0.98 | 5401 | 0.97 | 3.40 |
| BWA_DeepVariant       | 18616 | 0.99 | 5479 | 0.99 | 3.40 |
| BWA_FreeBayes         | 17728 | 0.96 | 5217 | 0.98 | 3.40 |
| BWA_GATK              | 18487 | 0.96 | 5459 | 0.94 | 3.40 |
| BWA_SAMTools          | 18549 | 0.98 | 5459 | 0.98 | 3.40 |
| Mosaik_DeepVariant    | 18240 | 0.97 | 5368 | 0.97 | 3.40 |
| Mosaik_FreeBayes      | 16253 | 0.9  | 4783 | 0.93 | 3.40 |
| Mosaik_GATK           | 16282 | 0.95 | 4765 | 0.96 | 3.40 |
| Mosaik_SAMTools       | -     | -    | -    | -    | -    |
| Novoalign_DeepVariant | 18626 | 0.99 | 5481 | 0.98 | 3.40 |
| Novoalign_FreeBayes   | 16984 | 0.94 | 4999 | 0.94 | 3.40 |
| Novoalign_GATK        | 18504 | 0.96 | 5463 | 0.94 | 3.40 |
| Novoalign_SAMTools    | 18551 | 0.99 | 5460 | 0.99 | 3.40 |
| SOAP_DeepVariant      | -     | -    | -    | -    | -    |
| SOAP_FreeBayes        | 16970 | 0.95 | 4994 | 0.94 | 3.40 |
| SOAP_GATK             | 17914 | 0.95 | 5232 | 0.95 | 3.40 |
| SOAP_SAMTools         | -     | -    | -    | -    | -    |

### Exome 3

| Pipe line          | Transition count | Transition F score | Transversion count | Transversion F score | Ti/Tv ratio |
|--------------------|------------------|--------------------|--------------------|----------------------|-------------|
| Bowtie_DeepVariant | 17492            | 0.96               | 5411               | 0.97                 | 3.23        |
| Bowtie_FreeBayes   | 17479            | 0.93               | 5352               | 0.93                 | 3.27        |
| Bowtie_GATK        | 17416            | 0.94               | 5225               | 0.95                 | 3.32        |
| Bowtie_SAMTools    | 17437            | 0.96               | 5344               | 0.97                 | 3.26        |
| BWA_DeepVariant    | 17634            | 0.97               | 5545               | 0.98                 | 3.18        |
| BWA_FreeBayes      | 17467            | 0.95               | 5345               | 0.96                 | 3.27        |
| BWA_GATK           | 17640            | 0.94               | 5459               | 0.95                 | 3.24        |
| BWA_SAMTools       | 17512            | 0.97               | 5459               | 0.98                 | 3.21        |
| Mosaik_DeepVariant | 17446            | 0.95               | 5337               | 0.96                 | 3.27        |
| Mosaik_FreeBayes   | 17362            | 0.91               | 5353               | 0.93                 | 3.24        |

|                       |                         |                           |                           |                             |                    |
|-----------------------|-------------------------|---------------------------|---------------------------|-----------------------------|--------------------|
| Mosaik_GATK           | 1544                    | 0.23                      | 512                       | 0.12                        | 2.23               |
| Mosaik_SAMTools       | -                       | -                         | -                         | -                           | -                  |
| Novoalign_DeepVariant | 17576                   | 0.97                      | 5583                      | 0.98                        | 3.15               |
| Novoalign_FreeBayes   | 17376                   | 0.91                      | 5312                      | 0.91                        | 3.27               |
| Novoalign_GATK        | 17642                   | 0.95                      | 5567                      | 0.92                        | 3.27               |
| Novoalign_SAMTools    | 17504                   | 0.96                      | 5418                      | 0.97                        | 3.23               |
| SOAP_DeepVariant      | -                       | -                         | -                         | -                           | -                  |
| SOAP_FreeBayes        | 17094                   | 0.82                      | 5148                      | 0.84                        | 3.32               |
| SOAP_GATK             | 17176                   | 0.94                      | 4767                      | 0.89                        | 3.55               |
| SOAP_SAMTools         | -                       | -                         | -                         | -                           | -                  |
| <b>Exome 4</b>        |                         |                           |                           |                             |                    |
| <b>Pipe line</b>      | <b>Transition count</b> | <b>Transition F_score</b> | <b>Transversion count</b> | <b>Transversion F_score</b> | <b>Ti/Tv ratio</b> |
| Bowtie_DeepVariant    | 17446                   | 0.94                      | 5457                      | 0.98                        | 3.20               |
| Bowtie_FreeBayes      | 16163                   | 0.89                      | 4947                      | 0.95                        | 3.27               |
| Bowtie_GATK           | 16355                   | 0.91                      | 5039                      | 0.96                        | 3.19               |
| Bowtie_SAMTools       | 17407                   | 0.94                      | 5433                      | 0.98                        | 3.20               |
| BWA_DeepVariant       | 17647                   | 0.97                      | 5532                      | 0.99                        | 3.19               |
| BWA_FreeBayes         | 17287                   | 0.89                      | 5198                      | 0.98                        | 3.29               |
| BWA_GATK              | 17364                   | 0.91                      | 5511                      | 0.97                        | 3.21               |
| BWA_SAMTools          | 17479                   | 0.96                      | 5522                      | 0.99                        | 3.17               |
| Mosaik_DeepVariant    | 17394                   | 0.93                      | 5389                      | 0.97                        | 3.23               |
| Mosaik_FreeBayes      | 15929                   | 0.88                      | 4967                      | 0.96                        | 3.21               |
| Mosaik_GATK           | 16898                   | 0.93                      | 4083                      | 0.97                        | 3.94               |
| Mosaik_SAMTools       | -                       | -                         | -                         | -                           | -                  |
| Novoalign_DeepVariant | 17597                   | 0.97                      | 5562                      | 0.99                        | 3.16               |
| Novoalign_FreeBayes   | 16153                   | 0.88                      | 4916                      | 0.96                        | 3.29               |
| Novoalign_GATK        | 17557                   | 0.93                      | 5480                      | 0.97                        | 3.23               |
| Novoalign_SAMTools    | 17463                   | 0.96                      | 5459                      | 0.99                        | 3.20               |
| SOAP_DeepVariant      | -                       | -                         | -                         | -                           | -                  |
| SOAP_FreeBayes        | 16134                   | 0.87                      | 5027                      | 0.97                        | 3.21               |

|               |       |      |      |      |      |
|---------------|-------|------|------|------|------|
| SOAP_GATK     | 17506 | 0.89 | 5175 | 0.97 | 3.33 |
| SOAP_SAMTools | -     | -    | -    | -    | -    |
