# Supplementary material for: Performance assessment of variant calling pipelines using human whole exome sequencing and simulated data
Source: PubMed Central journal article supplement (PMC6580603; doi:10.1186/s12859-019-2928-9), 2019-06-17
Supplement: 12859_2019_2928_MOESM14_ESM.pdf [file 12859_2019_2928_MOESM14_ESM.pdf]

| GRCh38                |       |       |      |             |           |         |       |       |      |      |             |           |         |       |
|-----------------------|-------|-------|------|-------------|-----------|---------|-------|-------|------|------|-------------|-----------|---------|-------|
| NA24385               |       |       |      |             |           |         |       |       |      |      |             |           |         |       |
|                       | SNV   |       |      |             |           |         |       | InDel |      |      |             |           |         |       |
| Pipeline              | TP    | FP    | FN   | Sensitivity | Precision | F-Score | FDR   | TP    | FP   | FN   | Sensitivity | Precision | F-Score | FDR   |
| Bowtie_DeepVariant    | 41071 | 1769  | 1099 | 0.974       | 0.959     | 0.966   | 0.041 | 4028  | 484  | 365  | 0.917       | 0.893     | 0.905   | 0.107 |
| Bowtie_FreeBayes      | 40921 | 1919  | 1231 | 0.971       | 0.955     | 0.963   | 0.045 | 3955  | 557  | 401  | 0.908       | 0.877     | 0.892   | 0.123 |
| Bowtie_GATK           | 41090 | 1750  | 1148 | 0.973       | 0.959     | 0.966   | 0.041 | 4021  | 491  | 312  | 0.928       | 0.891     | 0.909   | 0.109 |
| Bowtie_SAMtools       | 42103 | 737   | 1071 | 0.975       | 0.983     | 0.979   | 0.017 | 3882  | 630  | 476  | 0.891       | 0.860     | 0.875   | 0.140 |
| BWA_DeepVariant       | 42267 | 573   | 1031 | 0.976       | 0.987     | 0.981   | 0.013 | 4101  | 411  | 261  | 0.940       | 0.909     | 0.924   | 0.091 |
| BWA_FreeBayes         | 42063 | 777   | 1261 | 0.971       | 0.982     | 0.976   | 0.018 | 4001  | 511  | 371  | 0.915       | 0.887     | 0.901   | 0.113 |
| BWA_GATK              | 42152 | 688   | 1081 | 0.975       | 0.984     | 0.979   | 0.016 | 4095  | 417  | 278  | 0.936       | 0.908     | 0.922   | 0.092 |
| BWA_SAMtools          | 42257 | 583   | 1049 | 0.976       | 0.986     | 0.981   | 0.014 | 3861  | 651  | 498  | 0.886       | 0.856     | 0.870   | 0.144 |
| MOSAIK_DeepVariant    | 41082 | 1758  | 1111 | 0.974       | 0.959     | 0.966   | 0.041 | 4011  | 501  | 325  | 0.925       | 0.889     | 0.907   | 0.111 |
| MOSAIK_FreeBayes      | 42077 | 763   | 1293 | 0.970       | 0.982     | 0.976   | 0.018 | 3967  | 545  | 355  | 0.918       | 0.879     | 0.898   | 0.121 |
| MOSAIK_GATK           | 13830 | 29010 | 941  | 0.936       | 0.323     | 0.480   | 0.677 | 3561  | 951  | 2094 | 0.630       | 0.789     | 0.701   | 0.211 |
| MOSAIK_SAMtools       | -     | -     | -    | -           | -         | -       | -     | -     | -    | -    | -           | -         | -       | -     |
| Novoalign_DeepVariant | 42274 | 566   | 1023 | 0.976       | 0.987     | 0.982   | 0.013 | 4131  | 381  | 234  | 0.946       | 0.916     | 0.931   | 0.084 |
| Novoalign_FreeBayes   | 42051 | 789   | 1290 | 0.970       | 0.982     | 0.976   | 0.018 | 3951  | 561  | 392  | 0.910       | 0.876     | 0.892   | 0.124 |
| Novoalign_GATK        | 42139 | 701   | 1079 | 0.975       | 0.984     | 0.979   | 0.016 | 4129  | 383  | 241  | 0.945       | 0.915     | 0.930   | 0.085 |
| Novoalign_SAMtools    | 42251 | 589   | 1059 | 0.976       | 0.986     | 0.981   | 0.014 | 3897  | 615  | 420  | 0.903       | 0.864     | 0.883   | 0.136 |
| SOAP_DeepVariant      | -     | -     | -    | -           | -         | -       | -     | -     | -    | -    | -           | -         | -       | -     |
| SOAP_FreeBayes        | 40123 | 2717  | 2124 | 0.950       | 0.937     | 0.943   | 0.063 | 3592  | 920  | 2042 | 0.638       | 0.796     | 0.708   | 0.204 |
| SOAP_GATK             | 40891 | 1949  | 2041 | 0.952       | 0.955     | 0.953   | 0.045 | 3402  | 1110 | 2104 | 0.618       | 0.754     | 0.679   | 0.246 |
| SOAP_SAMtools         | -     | -     | -    | -           | -         | -       | -     | -     | -    | -    | -           | -         | -       | -     |
| GRCh37                |       |       |      |             |           |         |       |       |      |      |             |           |         |       |
| NA24631               |       |       |      |             |           |         |       |       |      |      |             |           |         |       |
|                       | SNV   |       |      |             |           |         |       | InDel |      |      |             |           |         |       |
| Pipeline              | TP    | FP    | FN   | Sensitivity | Precision | F-Score | FDR   | TP    | FP   | FN   | Sensitivity | Precision | F-Score | FDR   |
| Bowtie_DeepVariant    | 40482 | 649   | 992  | 0.976       | 0.984     | 0.980   | 0.016 | 2783  | 207  | 197  | 0.934       | 0.931     | 0.932   | 0.069 |
| Bowtie_FreeBayes      | 40412 | 719   | 882  | 0.979       | 0.983     | 0.981   | 0.017 | 2421  | 569  | 280  | 0.896       | 0.810     | 0.851   | 0.190 |
| Bowtie_GATK           | 40241 | 890   | 1063 | 0.974       | 0.978     | 0.976   | 0.022 | 2542  | 448  | 214  | 0.922       | 0.850     | 0.885   | 0.150 |

|                       |            |           |           |                    |                  |                |            |              |           |           |                    |                  |                |            |
|-----------------------|------------|-----------|-----------|--------------------|------------------|----------------|------------|--------------|-----------|-----------|--------------------|------------------|----------------|------------|
| Bowtie_SAMtools       | 40462      | 669       | 1003      | 0.976              | 0.984            | 0.980          | 0.016      | 2391         | 599       | 318       | 0.883              | 0.800            | 0.839          | 0.200      |
| BWA_DeepVariant       | 40580      | 551       | 748       | 0.982              | 0.987            | 0.984          | 0.013      | 2883         | 107       | 142       | 0.953              | 0.964            | 0.959          | 0.036      |
| BWA_FreeBayes         | 40089      | 1042      | 2833      | 0.934              | 0.975            | 0.954          | 0.025      | 2481         | 509       | 259       | 0.905              | 0.830            | 0.866          | 0.170      |
| BWA_GATK              | 40543      | 588       | 781       | 0.981              | 0.986            | 0.983          | 0.014      | 2858         | 132       | 181       | 0.940              | 0.956            | 0.948          | 0.044      |
| BWA_SAMtools          | 40559      | 572       | 751       | 0.982              | 0.986            | 0.984          | 0.014      | 2309         | 681       | 1078      | 0.682              | 0.772            | 0.724          | 0.228      |
| MOSAIK_DeepVariant    | 40213      | 918       | 1062      | 0.974              | 0.978            | 0.976          | 0.022      | 2691         | 299       | 203       | 0.930              | 0.900            | 0.915          | 0.100      |
| MOSAIK_FreeBayes      | 40132      | 999       | 2041      | 0.952              | 0.976            | 0.964          | 0.024      | 2313         | 677       | 294       | 0.887              | 0.774            | 0.827          | 0.226      |
| MOSAIK_GATK           | 8320       | 32811     | 430       | 0.951              | 0.202            | 0.334          | 0.798      | 2013         | 977       | 924       | 0.685              | 0.673            | 0.679          | 0.327      |
| MOSAIK_SAMtools       | -          | -         | -         | -                  | -                | -              | -          | -            | -         | -         | -                  | -                | -              | -          |
| Novoalign_DeepVariant | 40583      | 548       | 734       | 0.982              | 0.987            | 0.984          | 0.013      | 2881         | 109       | 159       | 0.948              | 0.964            | 0.956          | 0.036      |
| Novoalign_FreeBayes   | 40092      | 1039      | 2174      | 0.949              | 0.975            | 0.961          | 0.025      | 2311         | 679       | 274       | 0.894              | 0.773            | 0.829          | 0.227      |
| Novoalign_GATK        | 40537      | 594       | 821       | 0.980              | 0.986            | 0.983          | 0.014      | 2866         | 124       | 179       | 0.941              | 0.959            | 0.950          | 0.041      |
| Novoalign_SAMtools    | 40563      | 568       | 739       | 0.982              | 0.986            | 0.984          | 0.014      | 2351         | 639       | 351       | 0.870              | 0.786            | 0.826          | 0.214      |
| SOAP_DeepVariant      | -          | -         | -         | -                  | -                | -              | -          | -            | -         | -         | -                  | -                | -              | -          |
| SOAP_FreeBayes        | 40051      | 1080      | 2641      | 0.938              | 0.974            | 0.956          | 0.026      | 2308         | 682       | 1031      | 0.691              | 0.772            | 0.729          | 0.228      |
| SOAP_GATK             | 40031      | 1100      | 3021      | 0.930              | 0.973            | 0.951          | 0.027      | 2129         | 861       | 953       | 0.691              | 0.712            | 0.701          | 0.288      |
| SOAP_SAMtools         | -          | -         | -         | -                  | -                | -              | -          | -            | -         | -         | -                  | -                | -              | -          |
| <b>GRCh38</b>         |            |           |           |                    |                  |                |            |              |           |           |                    |                  |                |            |
| <b>NA24631</b>        |            |           |           |                    |                  |                |            |              |           |           |                    |                  |                |            |
|                       | <b>SNV</b> |           |           |                    |                  |                |            | <b>InDel</b> |           |           |                    |                  |                |            |
| <b>Pipeline</b>       | <b>TP</b>  | <b>FP</b> | <b>FN</b> | <b>Sensitivity</b> | <b>Precision</b> | <b>F-Score</b> | <b>FDR</b> | <b>TP</b>    | <b>FP</b> | <b>FN</b> | <b>Sensitivity</b> | <b>Precision</b> | <b>F-Score</b> | <b>FDR</b> |
| Bowtie_DeepVariant    | 43492      | 837       | 1850      | 0.959              | 0.981            | 0.970          | 0.019      | 3412         | 227       | 562       | 0.859              | 0.938            | 0.896          | 0.062      |
| Bowtie_FreeBayes      | 43351      | 978       | 1946      | 0.957              | 0.978            | 0.967          | 0.022      | 3333         | 306       | 653       | 0.836              | 0.916            | 0.874          | 0.084      |
| Bowtie_GATK           | 43539      | 790       | 1831      | 0.960              | 0.982            | 0.971          | 0.018      | 3409         | 230       | 582       | 0.854              | 0.937            | 0.894          | 0.063      |
| Bowtie_SAMtools       | 43678      | 651       | 1521      | 0.966              | 0.985            | 0.976          | 0.015      | 3278         | 361       | 780       | 0.808              | 0.901            | 0.852          | 0.099      |
| BWA_DeepVariant       | 43918      | 411       | 1345      | 0.970              | 0.991            | 0.980          | 0.009      | 3467         | 172       | 477       | 0.879              | 0.953            | 0.914          | 0.047      |
| BWA_FreeBayes         | 43609      | 720       | 1591      | 0.965              | 0.984            | 0.974          | 0.016      | 3389         | 250       | 603       | 0.849              | 0.931            | 0.888          | 0.069      |
| BWA_GATK              | 43852      | 477       | 1591      | 0.965              | 0.989            | 0.977          | 0.011      | 3471         | 168       | 501       | 0.874              | 0.954            | 0.912          | 0.046      |
| BWA_SAMtools          | 43893      | 436       | 1385      | 0.969              | 0.990            | 0.980          | 0.010      | 3219         | 420       | 809       | 0.799              | 0.885            | 0.840          | 0.115      |
| MOSAIK_DeepVariant    | 43502      | 827       | 1820      | 0.960              | 0.981            | 0.970          | 0.019      | 3381         | 258       | 581       | 0.853              | 0.929            | 0.890          | 0.071      |
| MOSAIK_FreeBayes      | 43590      | 739       | 1630      | 0.964              | 0.983            | 0.974          | 0.017      | 3331         | 308       | 621       | 0.843              | 0.915            | 0.878          | 0.085      |
