# Supplementary material for: Performance assessment of variant calling pipelines using human whole exome sequencing and simulated data
Source: PubMed Central journal article supplement (PMC6580603; doi:10.1186/s12859-019-2928-9), 2019-06-17
Supplement: 12859_2019_2928_MOESM15_ESM.pdf [file 12859_2019_2928_MOESM15_ESM.pdf]

**Table S10. Comparison of three benchmarking studies that used GiaB gold standard variant dataset NA12878**

|                                 | <b>Present study</b>                                                                  | <b>Hwang et al., 2015</b>                                                                           | <b>Highnam et al, 2015</b>                                                                                | <b>Cornish and Guda, 2015</b>                                                                                                      |
|---------------------------------|---------------------------------------------------------------------------------------|-----------------------------------------------------------------------------------------------------|-----------------------------------------------------------------------------------------------------------|------------------------------------------------------------------------------------------------------------------------------------|
| <b>GiaB Version</b>             | GiaB V3.3.2                                                                           | GiaB high confident integrated pedigree calls V0.2                                                  | GiaB V2.18                                                                                                | GiaB V2.15                                                                                                                         |
| <b>Genome Version</b>           | GRCh37&38                                                                             | GRCh37                                                                                              | GRCh37                                                                                                    | GRCh37                                                                                                                             |
| <b>Sequencing Platform</b>      | HiSeq2500                                                                             | HiSeq2000                                                                                           | HiSeq2000                                                                                                 | HiSeq2000                                                                                                                          |
| <b>Data sets used</b>           | NA12878, NA24385, NA24631 and Simulated Reads(WES)                                    | 12 Datasets NA12878(WES, WGS) including IonTorrent                                                  | NA12878(WES) and Simulated Reads                                                                          | NA12878(WES)                                                                                                                       |
| <b>Aligners</b>                 | BWA-MEM 0.7.16<br>Bowtie2 2.2.6<br>Novoalign 3.08.02<br>SOAP 2.21<br>MOSAIK 2.2.3     | Bowtie2-2.2.25<br>BWA-MEM-0.7.10<br>Novoalign-3.02.12<br>Tmap (for Ion Proton)                      | Bowtie2-2.0.0-beta5<br>BWA-0.7.5a<br>BWA-MEM-0.7.5a<br>Novoalign-3.00.04                                  | Bowtie2-2.1.0<br>BWA sampe-0.7.5a<br>BWA-MEM-0.7.5a<br>CUSHAW3-3.0.3<br>MOSAIK-2.2.3<br>Novoalign-3.02.07                          |
| <b>Variant callers</b>          | GATK HaplotypeCaller 4<br>FreeBayes 1.1.0<br>SAMtools mpileup 1.7<br>DeepVariant r0.4 | FreeBayes-0.9.18<br>GATK-HaplotypeCaller3.3.0<br>SAMtools mpileup-1.1<br>TVC-4.2.3 (for Ion Proton) | GATK-HaplotypeCaller3.1-1<br>GATK-UnifiedGenotyper3.1-1<br>SAMtools mpileup v0.1.18<br>Isaac v01.13.06.20 | FreeBayes v9.9.2-19- g011561f<br>GATK-HaplotypeCaller2.7-2<br>GATK-UnifiedGenotyper2.7-2<br>SAMtools mpileup-0.1.19<br>SNPSVM-0.01 |
| <b>Benchmark Method</b>         | F-Score                                                                               | Area under Precision-recall curve                                                                   | Positive predictive value                                                                                 | Positive predictive value, sensitivity separately                                                                                  |
| <b>Best Performing Pipeline</b> | BWA/Novoalign_DeepVariant (SNVs and InDels were analyzed separately)                  | SNVs: BWA_SAMtools<br>InDels: BWA_GATK HaplotypeCaller (SNVs and InDels were analyzed separately)   | Novoalign_GATK HaplotypeCaller (SNV and InDel were combined for this analysis)                            | Novoalign_GATK HaplotypeCaller (Only SNV was analyzed)                                                                             |
