# Supplementary material for: Performance assessment of variant calling pipelines using human whole exome sequencing and simulated data
Source: BMC Bioinformatics. 2019 Jun 17;20:342. doi: 10.1186/s12859-019-2928-9 (PMC6580603; doi:10.1186/s12859-019-2928-9)
Supplement: Supplementary file 10 — Table S5. F-score of pipelines for SNVs and InDels. F-score was used as the function of genotype concordance (PDF 139 kb) [file 12859_2019_2928_MOESM10_ESM.pdf]

**Table S5.** F-score of pipelines for SNVs and InDels. F-score was used as the function of genotype concordance

| Pipeline              | InDels detection |         |         |         | SNVs detection |         |         |         |
|-----------------------|------------------|---------|---------|---------|----------------|---------|---------|---------|
|                       | Exome-1          | Exome-3 | Exome-4 | Exome-4 | Exome-1        | Exome-2 | Exome-3 | Exome-4 |
| Bowtie_DeepVariant    | 0.884            | 0.908   | 0.914   | 0.914   | 0.873          | 0.893   | 0.893   | 0.913   |
| Bowtie_FreeBayes      | 0.813            | 0.841   | 0.864   | 0.864   | 0.793          | 0.8186  | 0.805   | 0.834   |
| Bowtie_GATK           | 0.845            | 0.893   | 0.905   | 0.905   | 0.816          | 0.829   | 0.843   | 0.893   |
| Bowtie_SAMtools       | 0.756            | 0.767   | 0.816   | 0.816   | 0.856          | 0.863   | 0.864   | 0.893   |
| BWA_DeepVariant       | 0.915            | 0.934   | 0.961   | 0.961   | 0.917          | 0.947   | 0.923   | 0.953   |
| BWA_FreeBayes         | 0.806            | 0.849   | 0.864   | 0.864   | 0.843          | 0.863   | 0.843   | 0.861   |
| BWA_GATK              | 0.893            | 0.92    | 0.946   | 0.946   | 0.853          | 0.883   | 0.883   | 0.891   |
| BWA_SAMtools          | 0.743            | 0.756   | 0.805   | 0.805   | 0.903          | 0.934   | 0.913   | 0.943   |
| Mosaik_DeepVariant    | 0.884            | 0.905   | 0.913   | 0.913   | 0.821          | 0.872   | 0.858   | 0.876   |
| MOSAIK_FreeBayes      | 0.817            | 0.847   | 0.864   | 0.864   | 0.761          | 0.813   | 0.803   | 0.856   |
| MOSAIK_GATK           | 0.143            | 0.158   | 0.834   | 0.834   | 0.784          | 0.838   | 0.823   | 0.851   |
| MOSAIK_SAMtools       | -                | -       | -       | -       | -              | -       | -       | -       |
| Novoalign_DeepVariant | 0.911            | 0.929   | 0.958   | 0.958   | 0.921          | 0.951   | 0.919   | 0.949   |
| Novoalign_FreeBayes   | 0.824            | 0.851   | 0.874   | 0.874   | 0.884          | 0.893   | 0.865   | 0.892   |
| Novoalign_GATK        | 0.901            | 0.92    | 0.941   | 0.941   | 0.899          | 0.907   | 0.873   | 0.901   |
| Novoalign_SAMtools    | 0.743            | 0.752   | 0.801   | 0.801   | 0.899          | 0.929   | 0.909   | 0.938   |
| SOAP_DeepVariant      | -                | -       | -       | -       | -              | -       | -       | -       |
| SOAP_FreeBayes        | 0.138            | 0.194   | 0.816   | 0.816   | 0.873          | 0.892   | 0.863   | 0.893   |
| SOAP_GATK             | 0.056            | 0.062   | 0.864   | 0.864   | 0.846          | 0.861   | 0.823   | 0.843   |
| SOAP_SAMtools         | -                | -       | -       | -       | -              | -       | -       | -       |
