# Supplementary material for: Performance assessment of variant calling pipelines using human whole exome sequencing and simulated data
Source: BMC Bioinformatics. 2019 Jun 17;20:342. doi: 10.1186/s12859-019-2928-9 (PMC6580603; doi:10.1186/s12859-019-2928-9)
Supplement: Supplementary file 11 — Table S6. F-score of pipelines for heterozygous and homozygous variants, and Heterozygous/Homozygous ratio. (PDF 290 kb) [file 12859_2019_2928_MOESM11_ESM.pdf]

**Table S6.** F-score of pipelines for heterozygous and homozygous variants, and Heterozygous/Homozygous

| SNVs                  |                        |         |         |         |                      |         |         |         |               |         |         |         |
|-----------------------|------------------------|---------|---------|---------|----------------------|---------|---------|---------|---------------|---------|---------|---------|
| Pipeline              | Heterozygous (F-score) |         |         |         | Homozygous (F-score) |         |         |         | Het/Hom Ratio |         |         |         |
|                       | Exome_1                | Exome_2 | Exome_3 | Exome_4 | Exome_1              | Exome_2 | Exome_3 | Exome_4 | Exome_1       | Exome_2 | Exome_3 | Exome_4 |
| Bowtie_DeepVariant    | 0.96                   | 0.98    | 0.96    | 0.97    | 0.97                 | 0.97    | 0.98    | 0.98    | 1.59          | 1.61    | 1.49    | 1.49    |
| Bowtie_FreeBayes      | 0.90                   | 0.95    | 0.92    | 0.91    | 0.91                 | 0.94    | 0.94    | 0.92    | 1.59          | 1.61    | 1.49    | 1.49    |
| Bowtie_GATK           | 0.94                   | 0.92    | 0.94    | 0.92    | 0.95                 | 0.93    | 0.95    | 0.94    | 1.59          | 1.61    | 1.49    | 1.49    |
| Bowtie_SAMtools       | 0.96                   | 0.98    | 0.95    | 0.96    | 0.97                 | 0.97    | 0.97    | 0.98    | 1.59          | 1.61    | 1.49    | 1.49    |
| BWA_DeepVariant       | 0.97                   | 0.99    | 0.98    | 0.97    | 0.98                 | 0.99    | 0.99    | 0.99    | 1.59          | 1.61    | 1.49    | 1.49    |
| BWA_FreeBayes         | 0.93                   | 0.95    | 0.94    | 0.95    | 0.95                 | 0.96    | 0.96    | 0.97    | 1.59          | 1.61    | 1.49    | 1.49    |
| BWA_GATK              | 0.96                   | 0.98    | 0.96    | 0.97    | 0.97                 | 0.98    | 0.99    | 0.98    | 1.59          | 1.61    | 1.49    | 1.49    |
| BWA_SAMtools          | 0.96                   | 0.99    | 0.97    | 0.97    | 0.98                 | 0.98    | 0.98    | 0.99    | 1.59          | 1.61    | 1.49    | 1.49    |
| Mosaik_DeepVariant    | 0.96                   | 0.98    | -       | -       | 0.97                 | 0.97    | -       | -       | 1.59          | 1.61    | -       | -       |
| MOSAIK_FreeBayes      | 0.91                   | 0.89    | 0.91    | 0.90    | 0.92                 | 0.89    | 0.92    | 0.92    | 1.59          | 1.61    | 1.49    | 1.49    |
| MOSAIK_GATK           | 0.15                   | 0.89    | 0.13    | 0.90    | 0.16                 | 0.90    | 0.13    | 0.91    | 1.59          | 1.61    | 1.49    | 1.49    |
| MOSAIK_SAMtools       | -                      | -       | 0.96    | 0.91    | -                    | -       | 0.98    | 0.93    | -             | -       | 1.49    | 1.49    |
| Novoalign_DeepVariant | 0.97                   | 0.99    | 0.96    | 0.97    | 0.98                 | 0.98    | 0.98    | 0.98    | 1.59          | 1.61    | 1.49    | 1.49    |
| Novoalign_FreeBayes   | 0.91                   | 0.92    | 0.91    | 0.91    | 0.92                 | 0.92    | 0.92    | 0.93    | 1.59          | 1.61    | 1.49    | 1.49    |
| Novoalign_GATK        | 0.96                   | 0.98    | 0.95    | 0.97    | 0.97                 | 0.96    | 0.98    | 0.97    | 1.59          | 1.61    | 1.49    | 1.49    |
| Novoalign_SAMtools    | 0.96                   | 0.99    | 0.97    | 0.97    | 0.98                 | 0.99    | 0.99    | 0.99    | 1.59          | 1.61    | 1.49    | 1.49    |
| SOAP_DeepVariant      | -                      | -       | -       | -       | -                    | -       | -       | -       | -             | -       | -       | -       |
| SOAP_FreeBayes        | 0.82                   | 0.92    | 0.82    | 0.91    | 0.83                 | 0.92    | 0.84    | 0.93    | 1.59          | 1.61    | 1.49    | 1.49    |
| SOAP_GATK             | 0.94                   | 0.96    | 0.95    | 0.94    | 0.95                 | 0.95    | 0.96    | 0.96    | 1.59          | 1.61    | 1.49    | 1.49    |
| SOAP_SAMtools         | -                      | -       | -       | -       | -                    | -       | -       | -       | -             | -       | -       | -       |
| InDels                |                        |         |         |         |                      |         |         |         |               |         |         |         |
| Pipeline              | Heterozygous (F-score) |         |         |         | Homozygous (F-score) |         |         |         | Het/Hom Ratio |         |         |         |
|                       | Exome_1                | Exome_2 | Exome_3 | Exome_4 | Exome_1              | Exome_2 | Exome_3 | Exome_4 | Exome_1       | Exome_2 | Exome_3 | Exome_4 |
| Bowtie_DeepVariant    | 0.87                   | 0.94    | 0.88    | 0.92    | 0.88                 | 0.94    | 0.94    | 0.93    | 1.19          | 1.19    | 1.16    | 1.26    |
| Bowtie_FreeBayes      | 0.84                   | 0.56    | 0.82    | 0.60    | 0.86                 | 0.66    | 0.88    | 0.68    | 1.19          | 1.19    | 1.16    | 1.26    |
| Bowtie_GATK           | 0.90                   | 0.86    | 0.89    | 0.86    | 0.90                 | 0.89    | 0.94    | 0.88    | 1.19          | 1.19    | 1.16    | 1.25    |
| Bowtie_SAMtools       | 0.75                   | 0.76    | 0.72    | 0.74    | 0.78                 | 0.79    | 0.78    | 0.77    | 1.19          | 1.19    | 1.16    | 1.26    |
| BWA_DeepVariant       | 0.95                   | 1.00    | 0.93    | 0.99    | 0.96                 | 0.99    | 0.98    | 1.00    | 1.19          | 1.19    | 1.16    | 1.26    |
| BWA_FreeBayes         | 0.87                   | 0.58    | 0.84    | 0.60    | 0.88                 | 0.67    | 0.89    | 0.68    | 1.19          | 1.19    | 1.16    | 1.26    |
| BWA_GATK              | 0.94                   | 0.98    | 0.90    | 0.97    | 0.95                 | 0.98    | 0.97    | 0.99    | 1.19          | 1.19    | 1.16    | 1.26    |
| BWA_SAMtools          | 0.76                   | 0.75    | 0.76    | 0.79    | 0.79                 | 0.78    | 0.82    | 0.82    | 1.19          | 1.19    | 1.16    | 1.26    |
| Mosaik_DeepVariant    | 0.89                   | 0.91    | -       | -       | 0.90                 | 0.91    | -       | -       | 1.19          | 1.19    | -       | -       |
| MOSAIK_FreeBayes      | 0.76                   | 0.53    | 0.75    | 0.57    | 0.80                 | 0.62    | 0.82    | 0.65    | 1.19          | 1.19    | 1.16    | 1.26    |
| MOSAIK_GATK           | 0.15                   | 0.84    | 0.09    | 0.88    | 0.15                 | 0.87    | 0.10    | 0.90    | 1.18          | 1.19    | 1.18    | 1.26    |
| MOSAIK_SAMtools       | -                      | -       | 0.81    | 0.88    | -                    | -       | 0.86    | 0.90    | -             | -       | 1.16    | 1.26    |
| Novoalign_DeepVariant | 0.95                   | 0.99    | 0.93    | 0.99    | 0.96                 | 0.99    | 0.98    | 1.00    | 1.19          | 1.19    | 1.16    | 1.25    |
| Novoalign_FreeBayes   | 0.86                   | 0.58    | 0.84    | 0.61    | 0.88                 | 0.67    | 0.90    | 0.69    | 1.19          | 1.19    | 1.16    | 1.26    |
| Novoalign_GATK        | 0.94                   | 0.99    | 0.92    | 0.98    | 0.96                 | 0.99    | 0.98    | 0.99    | 1.19          | 1.19    | 1.16    | 1.26    |
| Novoalign_SAMtools    | 0.78                   | 0.74    | 0.78    | 0.77    | 0.92                 | 0.77    | 0.84    | 0.80    | 1.19          | 1.19    | 1.16    | 1.26    |
| SOAP_DeepVariant      | -                      | -       | -       | -       | -                    | -       | -       | -       | -             | -       | -       | -       |
| SOAP_FreeBayes        | 0.33                   | 0.55    | 0.21    | 0.57    | 0.33                 | 0.64    | 0.22    | 0.65    | 1.18          | 1.19    | 1.17    | 1.26    |
| SOAP_GATK             | 0.10                   | 0.82    | 0.06    | 0.89    | 0.10                 | 0.85    | 0.06    | 0.91    | 1.22          | 1.19    | 1.17    | 1.26    |
| SOAP_SAMtools         | -                      | -       | -       | -       | -                    | -       | -       | -       | -             | -       | -       | -       |
